# Supplementary material for: Natural selection at the RASGEF1C (GGC) repeat in human and divergent genotypes in late-onset neurocognitive disorder.
Source: Research Square preprint supplement (doi:10.21203/rs.3.rs-835509/v1), 2021-08-24
Supplement: Supplementary file 2 [file da213fef9d5bf115b1ce0062.xlsx]

## Sheet: Sheet2
329	C	6/11		6
330	C	6/6		6
331	C	6/8		6
401	C	6/6		6
338	C	11/11		11
152	C	6/6		6
423	C	6/6		6
119	C	6/6		6
248	C	6/6		6
380	C	6/6		6
384	C	6/7		6
190	C	6/6		6
405	C	6/11		6
411	C	6/7		6
449	C	6/6		6
450	C	6/6		6
303	C	6/11		6
300	C	5/6		5
52	C	6/6		6
55	C	6/6		6
88	C	6/8		6
286	C	6/6		6
108	C	6/6		6
249	C	6/8		6
246	C	6/6		6
126	C	5/6		5
104	C	6/6		6
155	C	6/6		6
272	C	6/6		6
187	C	6/6		6
240	C	6/6		6
245	C	6/6		6
138	C	6/11		6
156	C	6/7		6
14	C	6/6		6
288	C	6/6		6
153	C	6/11		6
191	C	6/6		6
12	C	6/7		6
170	C	8/8		8
171	C	6/8		6
197	C	6/6		6
140	C	6/8		6
175	C	6/11		6
306	C	6/6		6
120	C	6/6		6
512	C	6/6		6
416	C	6/8		6
438	C	6/6		6
330	C	6/6		6
69	C	6/6		6
95	C	6/8		6
146	C	6/6		6
149	C	6/6		6
114	C	6/6		6
151	C	6/6		6
124	C	6/6		6
153	C	6/11		6
202	C	6/6		6
120	C	6/6		6
187	C	6/6		6
206	C	6/6		6
210	C	6/7		6
138	C	6/6		6
198	C	6/11		6
155	C	6/6		6
228	C	6/11		6
234	C	6/6		6
253	C	6/6		6
298	C	6/7		6
305	C	6/6		6
313	C	6/9		6
342	C	6/6		6
284	C	6/6		6
5	C	6/6		6
6	C	6/6		6
8	C	6/11		6
13	C	6/8		6
16	C	6/6		6
23	C	6/6		6
26	C	5/6		5
64	C	6/6		6
75	C	6/7		6
58	C	6/6		6
56	C	6/6		6
54	C	6/8		6
52	C	6/6		6
46	C	6/6		6
34	C	6/9		6
306	C	6/6		6
307	C	6/6		6
315	C	6/9		6
257	C	6/6		6
358	C	6/11		6
200	C	6/7		6
305	C	6/6		6
450	C	6/6		6
15	C	6/6		6
17	C	6/6		6
30	C	6/7		6
258	C	6/6		6
352	C	6/6		6
519	C	6/6		6
523	C	6/6		6
538	C	6/6		6
539	C	6/7		6
512	C	6/6		6
535	C	6/6		6
536	C	6/6		6
528	C	6/6		6
545	C	6/6		6
489	C	6/7		6
484	C	6/6		6
494	C	6/6		6
518	C	6/6		6
517	C	6/8		6
480	C	6/6		6
472	C	6/6		6										+A1:D8	Control	NCD	Series 3
508	C	6/6		6										5/6	1.94	1.73	2
507	C	6/6		6										6/6	70.77	66.08	2
464	C	6/6		6										6/7	7.14	4.34	3
483	C	6/6		6										6/8	7.79	11.3	5
465	C	6/6		6										6/9	3.24	4.34
488	C	6/6		6										6/11	7.79	2.6
468	C	6/6		6										7/7	0	0.86
460	C	6/6		6										7/8	0	0.86
541	C	6/6		6										7/9	0	0.86
490	C	6/6		6										8/8	0.64	5.21
102	C	11/11		11										8/11	0	1.73
94	C	6/6		6										11/11	1.29	0
490	C	6/6		6
95	C	6/8		6
214	C	6/9		6
217	C	6/6		6
224	C	6/6		6
243	C	6/6		6
245	C	6/6		6
248	C	6/6		6
283	C	6/6		6
108	C	6/6		6
88	C	6/8		6
387	C	6/6		6
340	C	6/9		6
339	C	6/11		6
224	C	6/6		11
209	C	6/6		6
216	C	6/6		8
131	C	6/6		6
483	C	6/6		11
251	C	6/6		6
257	C	6/6		6
272	C	6/6		6
469	C	6/6		6
576	C	6/6		6
				7
				6
				11
				7
				6
				6
				11
				6
				6
				6
				8
				6
				6
				8
				6
				6
				6
				6
				6
				6
				6
				6
				11
				7
				6
				6
				11
				6
				7
				8
				8
				6
				8
				11
				6
				6
				6
				8
				6
				6
				6
				8
				6
				6
				6
				6
				6
				11
				6
				6
				6
				6
				7
				6
				11
				6
				11
				6
				6
				7
				6
				9
				6
				6
				6
				6
				11
				8
				6
				6
				6
				6
				7
				6
				6
				8
				6
				6
				9
				6
				6
				9
				6
				11
				7
				6
				6
				6
				6
				7
				6
				6
				6
				6
				6
				7
				6
				6
				6
				6
				6
				7
				6
				6
				6
				8
				6
				6
				6
				6
				6
				6
				6
				6
				6
				6
				6
				6
				11
				6
				6
				8
				9
				6
				6
				6
				6
				6
				6
				6
				8
				6
				9
				6
				6
				6
				6
				6
				6
				6
				6
				6
				6
				6
				6
				6
				6
				6
				6
				6
				6
				6
				6
